# Supplementary material for: Crystal Structures of the Kinase Domain of the Sulfate-Activating Complex in Mycobacterium tuberculosis
Source: PubMed Central journal article supplement (PMC4373884; doi:10.1371/journal.pone.0121494), 2015-03-25
Supplement: pone.0121494.s001.pdf [file pone.0121494.s001.pdf]

## Supporting information S1

### **Evidence of redox regulation by a single cysteine residue in the kinase domain of the sulfate-activating complex in *Mycobacterium tuberculosis***

Ömer Poyraz<sup>a,§</sup>, Katharina Brunner<sup>a</sup>, Bernhard Lohkamp<sup>a</sup>, Hanna Axelsson<sup>b</sup>, Lars G.J. Hammarström<sup>b</sup>, Robert Schnell<sup>a</sup> and Gunter Schneider<sup>a\*</sup>

Department of Medical Biochemistry and Biophysics, Karolinska Institutet, S-171 77 Stockholm, Sweden

Chemical Biology Consortium Sweden, Science for Life Laboratory Stockholm, Department of Medical Biochemistry and Biophysics, Karolinska Institutet, Solna, Sweden.

<sup>§</sup>Present address: Department of Clinical Neuroscience, Therapeutic Immune Design Unit, Karolinska Institutet, Stockholm, Sweden

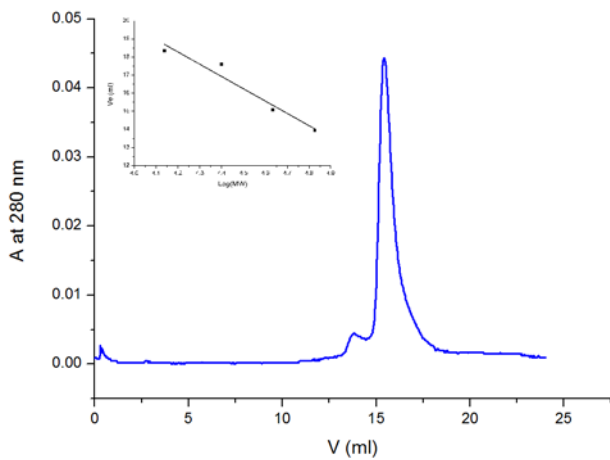

A

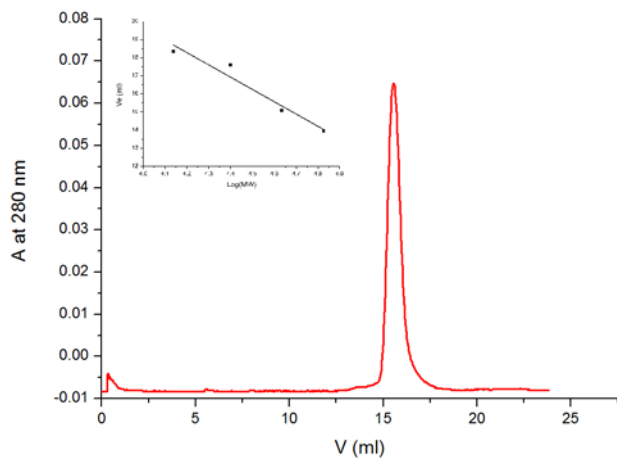

B

**S1 Figure.** Size exclusion chromatography elution profiles of wild type His6-CysC (A) and the C556S mutant (B). The calibration curve is shown in the inserts. A Superdex Increase 10/300 analytical size exclusion chromatography column (GE Healthcare) was equilibrated with the buffer 25 mM Tris-HCl, 150 mM NaCl and 1 mg/ml protein solution was used to carry out the experiment. The column was calibrated with Ribonuclease-A (13.7 kDa), Chymotrypsinogen-A (25 kDa), Ovalbumin (43 kDa), Bovine Serum Albumin (67 kDa) and Blue Dextran (2 MDa). The experimental molecular weights of the His6-CysC and the C556S mutant were calculated from the elution volume (major peak 15.46 ml) using the calibration curve (insert). The resulting molecular weight is 42 kDa corresponding to a dimer, considering the molecular weight of 21261 Da of the CysC monomer calculated from the amino acid sequence.
