# Supplementary material for: Crystal Structures of the Kinase Domain of the Sulfate-Activating Complex in Mycobacterium tuberculosis
Source: PubMed Central journal article supplement (PMC4373884; doi:10.1371/journal.pone.0121494), 2015-03-25
Supplement: pone.0121494.s003.pdf [file pone.0121494.s003.pdf]

## Supplementary figure S3

### **Evidence of redox regulation by a single cysteine residue in the kinase domain of the sulfate-activating complex in *Mycobacterium tuberculosis***

Ömer Poyraz<sup>a,§</sup>, Katharina Brunner<sup>a</sup>, Bernhard Lohkamp<sup>a</sup>, Hanna Axelsson<sup>b</sup>, Lars G.J. Hammarström<sup>b</sup>, Robert Schnell<sup>a</sup> and Gunter Schneider<sup>a\*</sup>

Department of Medical Biochemistry and Biophysics, Karolinska Institutet, S-171 77 Stockholm, Sweden

Chemical Biology Consortium Sweden, Science for Life Laboratory Stockholm, Department of Medical Biochemistry and Biophysics, Karolinska Institutet, Solna, Sweden.

<sup>§</sup>Present address: Department of Clinical Neuroscience, Therapeutic Immune Design Unit, Karolinska Institutet, Stockholm, Sweden

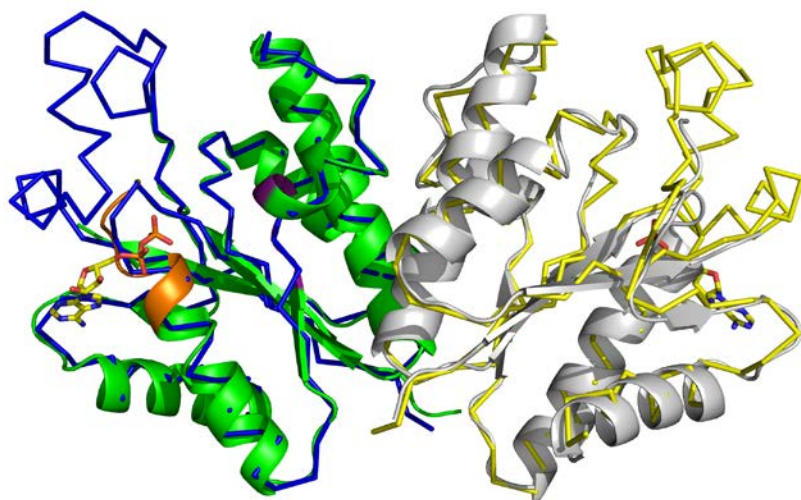

**S3 Figure.** Superposition of the structure of the Cys556Ser mutant and the ADP-bound wild-type CysC. The crystal structure of the Cys556Ser mutant is shown as a cartoon in green (chain A) and grey (chain B). The ligand binding motifs such as the P-loop (orange) and the conserved LDGD motif (purple) are highlighted in chain A. The backbone of the ADP complex of wild-type CysC is shown as ribbon in blue (chain A) and yellow (chain B) and the ADP molecule is shown as stick model.
